# Supplementary material
Source: publisher site journal article supplement (https://www.dovepress.com/article/449887)
Supplement: Supplementary file 1 [file get_supplementary_file.php]

**Supplemental Table 1 Primers used in the present study**

| Gene name | Primer sequence (5’-3’) |
| --- | --- |
| *AKR1C1* | Forward Primer: TCCAGTGTCTGTAAAGCCAGG |
|  | Reverse Primer: CCAGCAGTTTTCTCTGGTTGAA |
| *CELF6* | Forward Primer: CCCATCGGGGTCAATGGATTC |
|  | Reverse Primer: GCCCGTTATTGTAGAGCGTGT |
| *CRYAB* | Forward Primer: CCTGAGTCCCTTCTACCTTCG |
|  | Reverse Primer: CACATCTCCCAACACCTTAACTT |
| *FOSB* | Forward Primer: GCTGCAAGATCCCCTACGAAG |
|  | Reverse Primer: ACGAAGAAGTGTACGAAGGGTT |
| *KIF20A* | Forward Primer: TGCTGTCCGATGACGATGTC |
|  | Reverse Primer: AGGTTCTTGCGTACCACAGAC |
| *MAOA* | Forward Primer: GAATCAAGAGAAGGCGAGTATCG |
|  | Reverse Primer: GGCAGCAGATAGTCCTGAAATG |
| *MXRA5* | Forward Primer: CATCCCCGATGGAGCTTTAAG |
|  | Reverse Primer: TCAATGTGCAGCCTCATTAAGTT |
| *OAS2* | Forward Primer: CTCAGAAGCTGGGTTGGTTTAT |
|  | Reverse Primer: ACCATCTCGTCGATCAGTGTC |
| *PLK1* | Forward Primer: CACCAGCACGTCGTAGGATTC |
|  | Reverse Primer: CCGTAGGTAGTATCGGGCCTC |
| *SYT12* | Forward Primer: GTTCCCCAATTACGACTACAGG |
|  | Reverse Primer: TCAATGCTGAGACTGCCTTTG |
| *CACNA1C* | Forward Primer: AATCGCCTATGGACTCCTCTT |
|  | Reverse Primer: GCGCCTTCACATCAAATCCG |
| *DDIT3* | Forward Primer: GGAAACAGAGTGGTCATTCCC |
|  | Reverse Primer: CTGCTTGAGCCGTTCATTCTC |
| *DUSP2* | Forward Primer: TGCCCCAACCACTTTGAGG |
|  | Reverse Primer: AGTCAATGAAGCCTATGGCCT |
| *FOS* | Forward Primer: CCGGGGATAGCCTCTCTTACT |
|  | Reverse Primer: CCAGGTCCGTGCAGAAGTC |
| *GADD45A* | Forward Primer: GAGAGCAGAAGACCGAAAGGA |
|  | Reverse Primer: CAGTGATCGTGCGCTGACT |
| *HSPA6* | Forward Primer: CATCGCCTATGGGCTGGAC |
|  | Reverse Primer: GGAGAGAACCGACACATCGAA |
| *JUN* | Forward Primer: AACAGGTGGCACAGCTTAAAC |
|  | Reverse Primer: CAACTGCTGCGTTAGCATGAG |
| *CCNB1* | Forward Primer: AATAAGGCGAAGATCAACATGGC |
|  | Reverse Primer: TTTGTTACCAATGTCCCCAAGAG |
| *CCNB2* | Forward Primer: CCGACGGTGTCCAGTGATTT |
|  | Reverse Primer: TGTTGTTTTGGTGGGTTGAACT |
| *ESPL1* | Forward Primer: GCTACTTAGTGTCTACCCCACA |
|  | Reverse Primer: CAGCAGCATTCCGCAGTAAGA |
| *RACGAP1* | Forward Primer: ATGATGCTGAATGTGCGGAAT |
|  | Reverse Primer: CGCCAACTGGATAAATTGGACTT |
| *GAPDH* | Forward Primer: CTGGGCTACACTGAGCACC |
|  | Reverse Primer: AAGTGGTCGTTGAGGGCAATG |

**Supplemental Figure 1. Size distribution and polydispersity index of Cu-CDs**


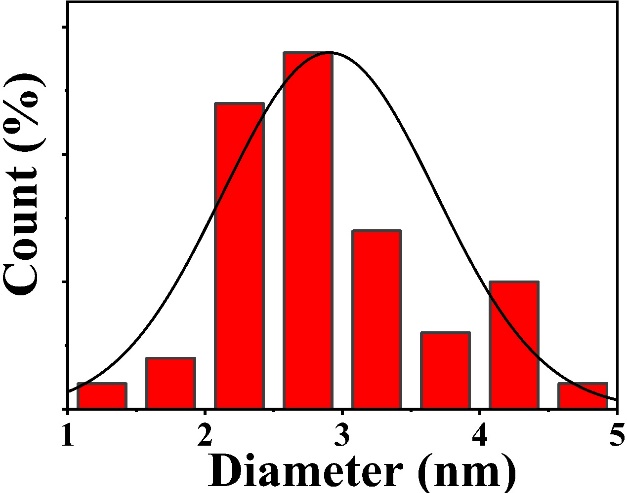


**Supplemental Figure 2. High-resolution XPS spectra of Cu-CDs**

**A: C1s. B: N1s. C: S2p. D: O1s**

**
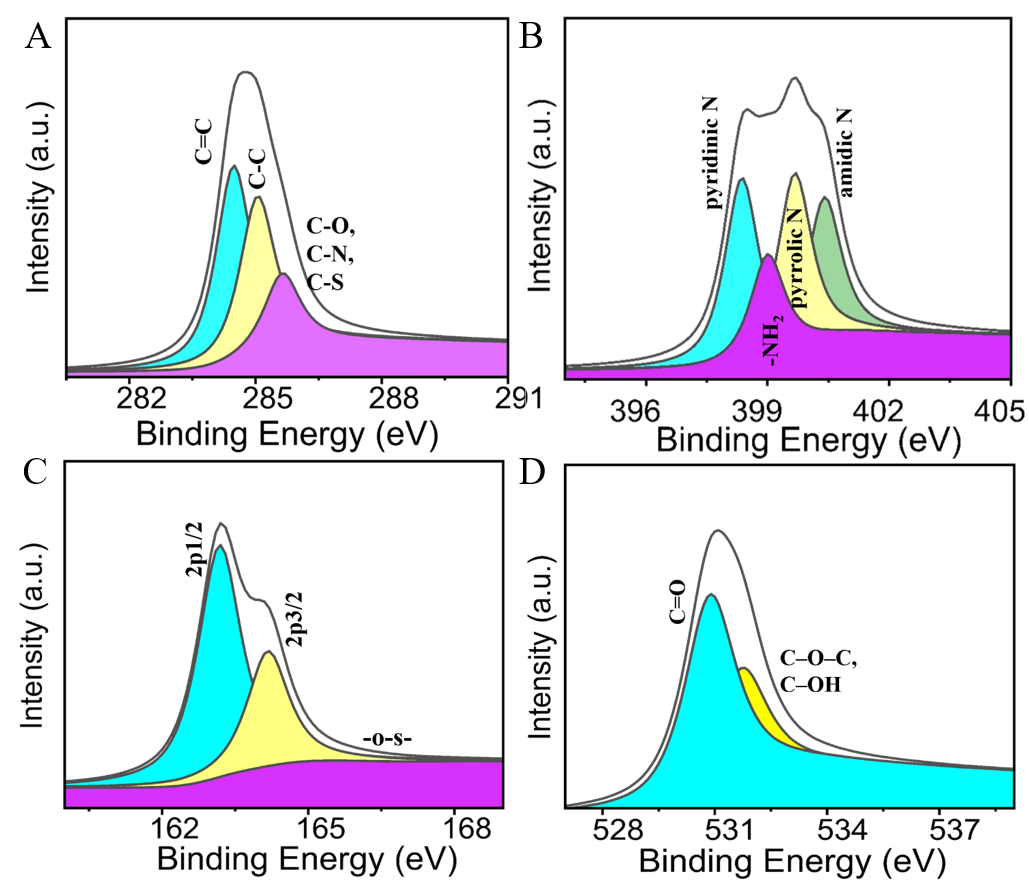
**

**Supplemental Figure 3. Effect of Cu-CDs treatments on the blood physiological parameters and histological damages of C57/BL6 mice**

**A: Quantitative number of WBC. B: Quantitative number of RBC. C: Quantitative result of HGB. D: Quantitative result of PLT. E: Quantitative result of MCH. F: Quantitative result of MCHC. G: Masson trichrome staining. H: PAS staining. ns represents P>0.05.**


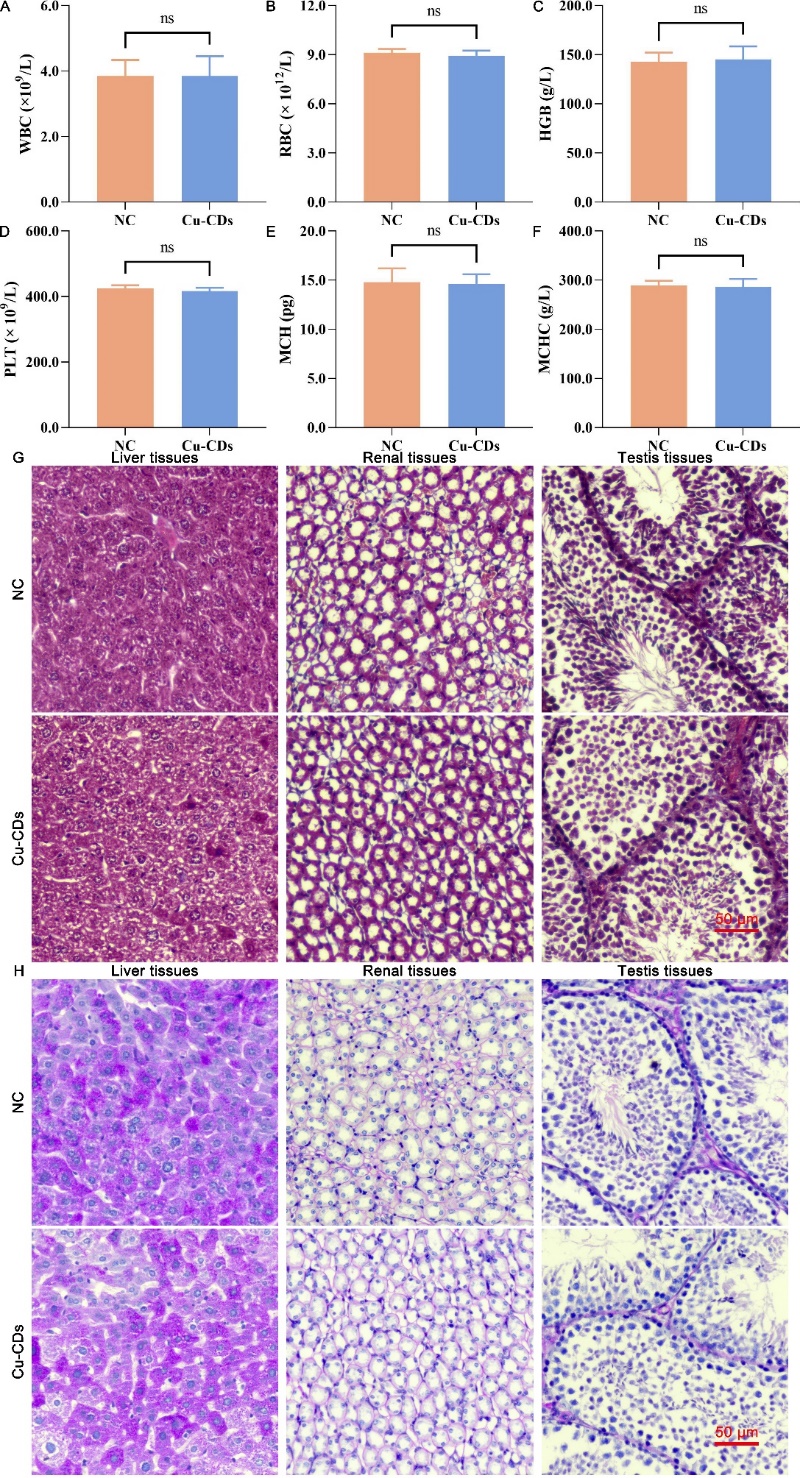


**Supplemental Figure 4. Effect of Cu-CDs treatments on cellular viability of MDA-MB-231 cells**

*** represents P<0.05, with ** representing P<0.01, and *** representing P<0.001.**

**
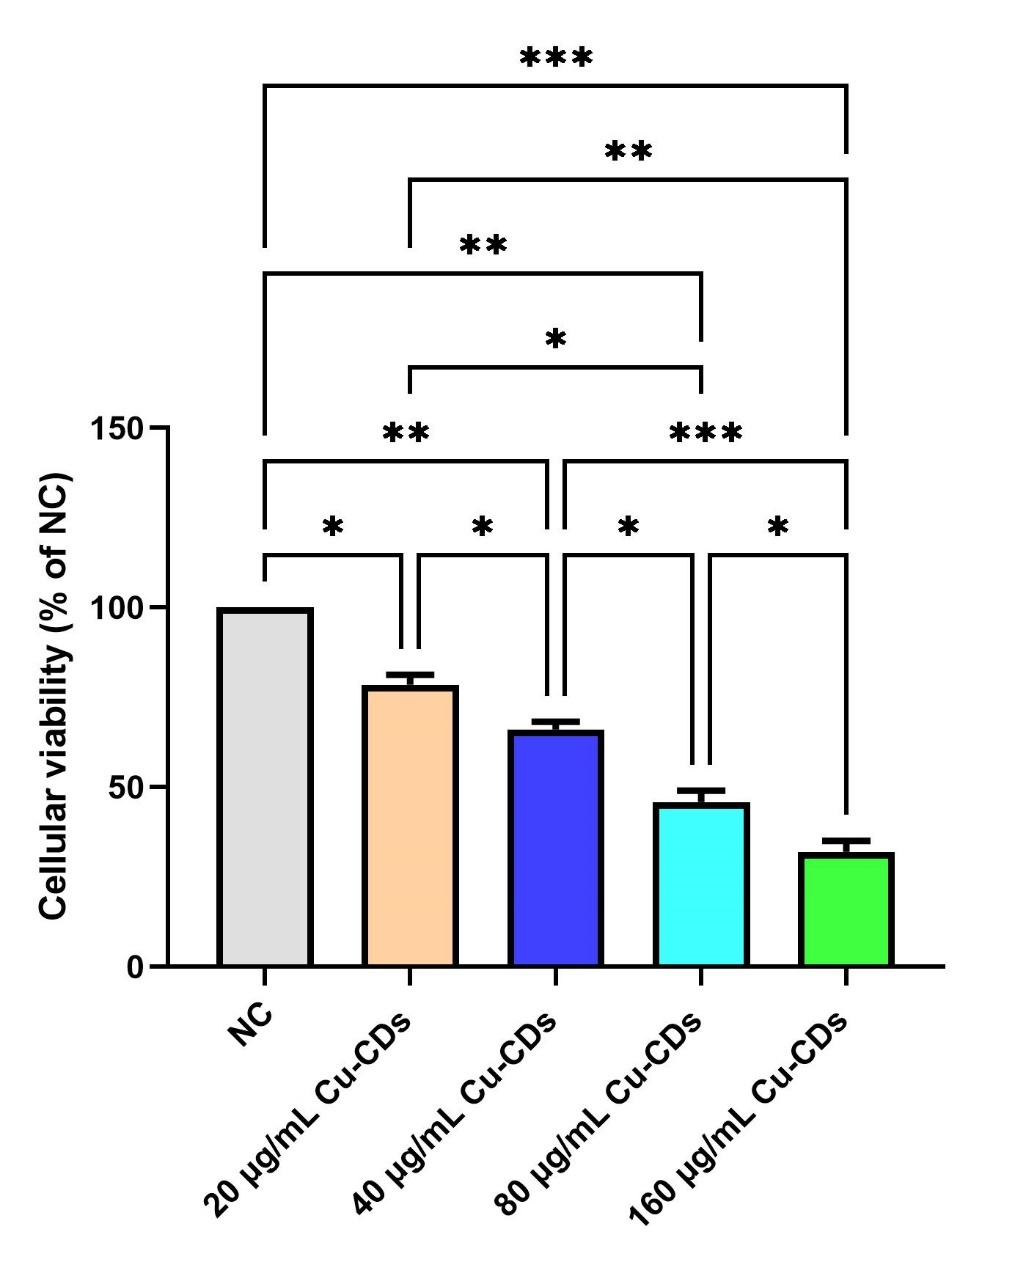
**

**Supplemental Figure 5. Effect of Cu-CDs treatments on the expression levels of apoptosis-related proteins**

**A: Western blot analysis of apoptosis-related proteins. B: Protein expression level of Bax relative to ACTIN. C:** **Protein expression level of Bcl-2 relative to ACTIN. * represents P<0.05 with **** representing P<0.0001.**

**
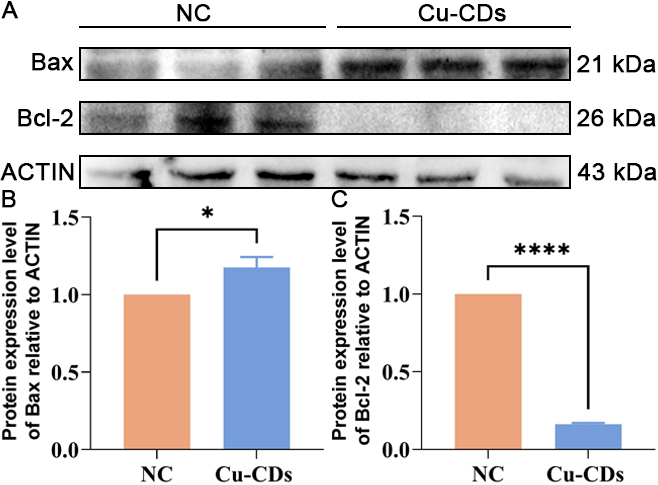
**

**Supplemental Figure 6. Accuracy validation of DEGs in the Cu-CDs treated MDA-MB-231 cells**

**A: Expression levels of DEGs in breast cancer tissues and normal breast tissues based on the GEPIA database. BRCA represents breast invasive carcinoma. T and N represent cancer and normal tissue groups. B: Gene count of DEGs in MDA-MB-231 cells between the NC and Cu-CDs groups. C: Relative expression levels of DEGs in MDA-MB-231 cells between the NC and Cu-CDs groups. * represents P<0.05, with ** representing P<0.01, and *** representing P<0.001.**

**
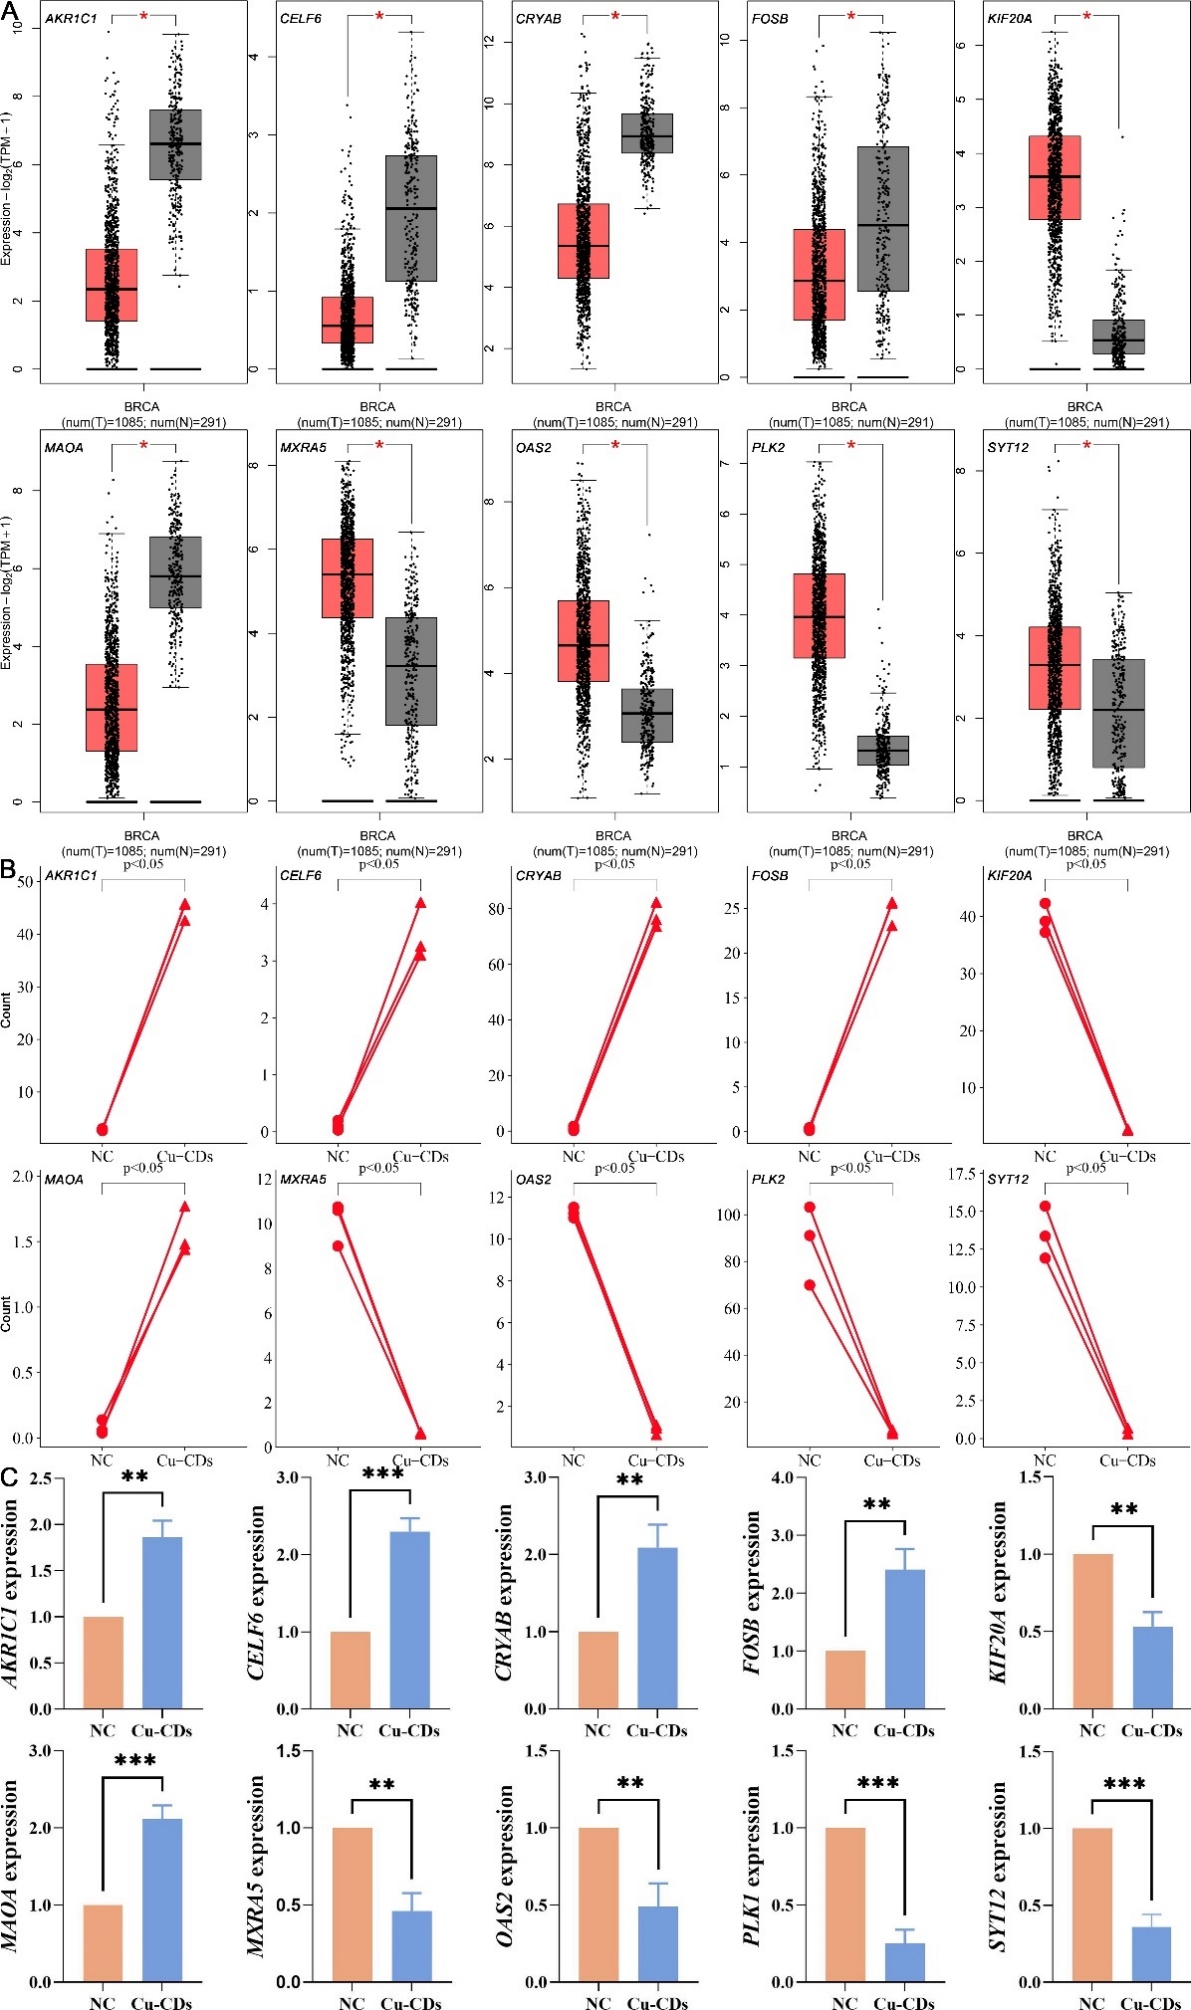
**

**Supplemental Figure 7. Expression levels of MAPK signaling pathway-related genes in the Cu-CDs treated MDA-MB-231 cells**

**A: Expression level of *CACNA1C* in the Cu-CDs treated MDA-MB-231 cells. B: Expression level of *DDIT3* in the Cu-CDs treated MDA-MB-231 cells. C: Expression level of *DUSP2* in the Cu-CDs treated MDA-MB-231 cells. D: Expression level of *GADD45A* in the Cu-CDs treated MDA-MB-231 cells. E: Expression level of *HSPA6* in the Cu-CDs treated MDA-MB-231 cells. F: Expression level of *JUN* in the Cu-CDs treated MDA-MB-231 cells. * represents P<0.05, with ** representing P<0.01, and *** representing P<0.001.**

**
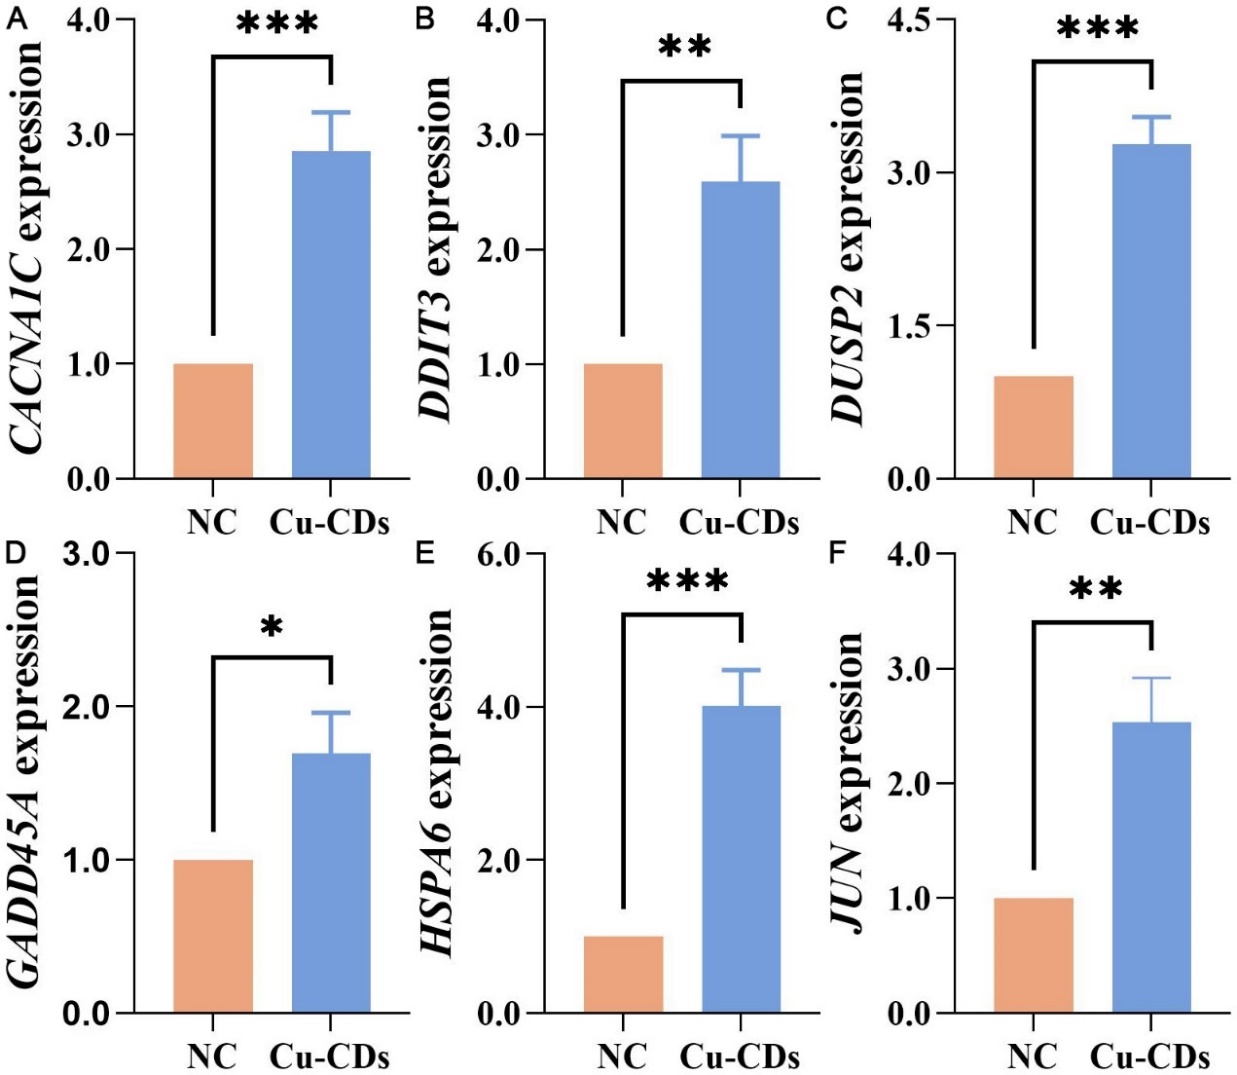
**

**Supplemental Figure 8. Accuracy validation of hub genes in the Cu-CDs treated MDA-MB-231 cells**

**A: Expression levels of hub genes in breast cancer tissues and normal breast tissues based on the GEPIA database. B: Gene count of hub genes in the Cu-CDs treated MDA-MB-231 cells. C: Relative expression levels of hub genes in the Cu-CDs treated MDA-MB-231 cells. * represents P<0.05, with ** representing P<0.01, and *** representing P<0.001.**

**
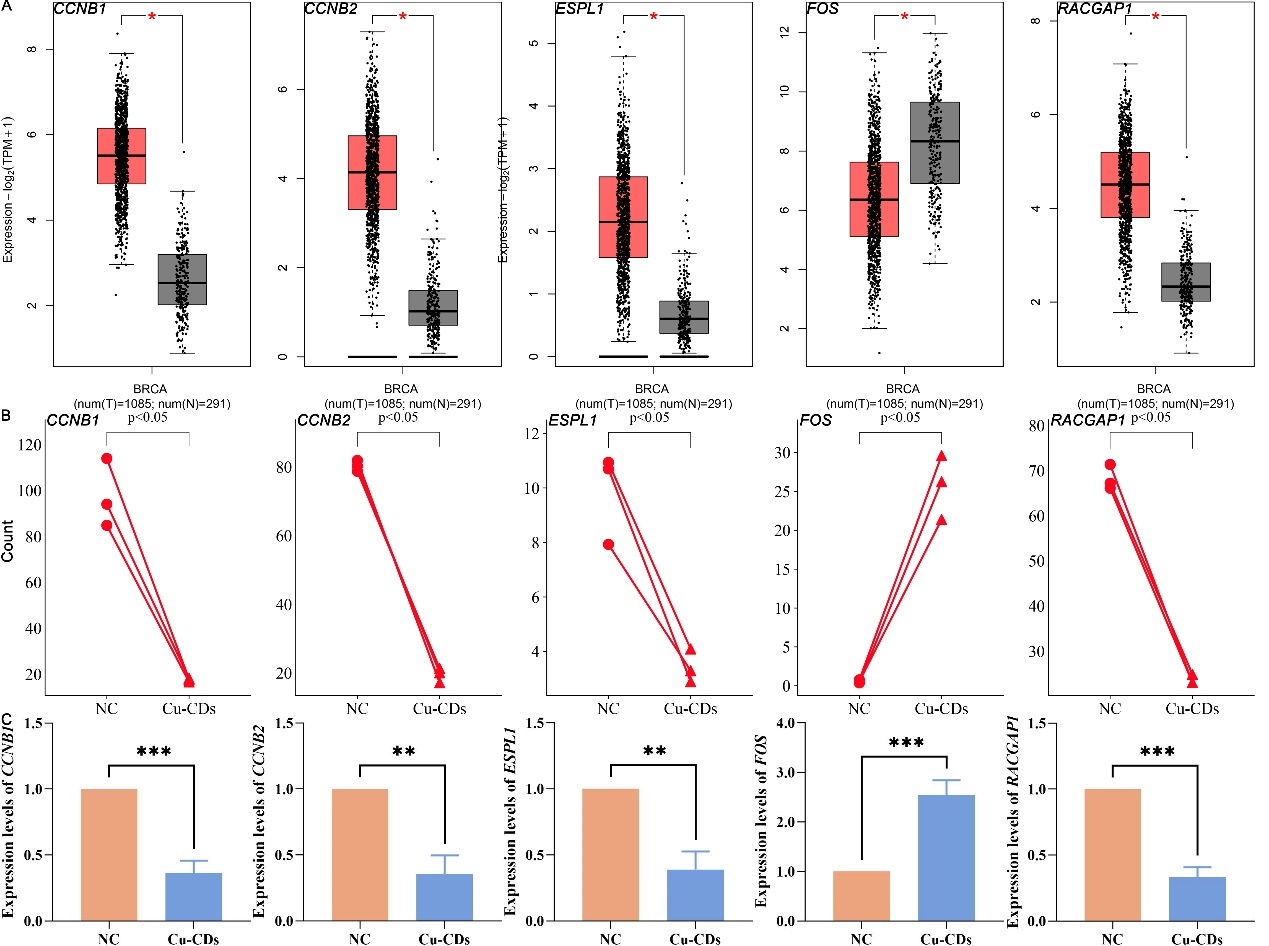
**

**Supplemental Figure 9. Association between the expression level of hub genes and survival of breast cancer patients based on the Kaplan-Meier plotter database**

**A: Association between the expression level of hub genes and OS of breast cancer patients. B: Association between the expression level of hub genes and RFS of breast cancer patients**

**
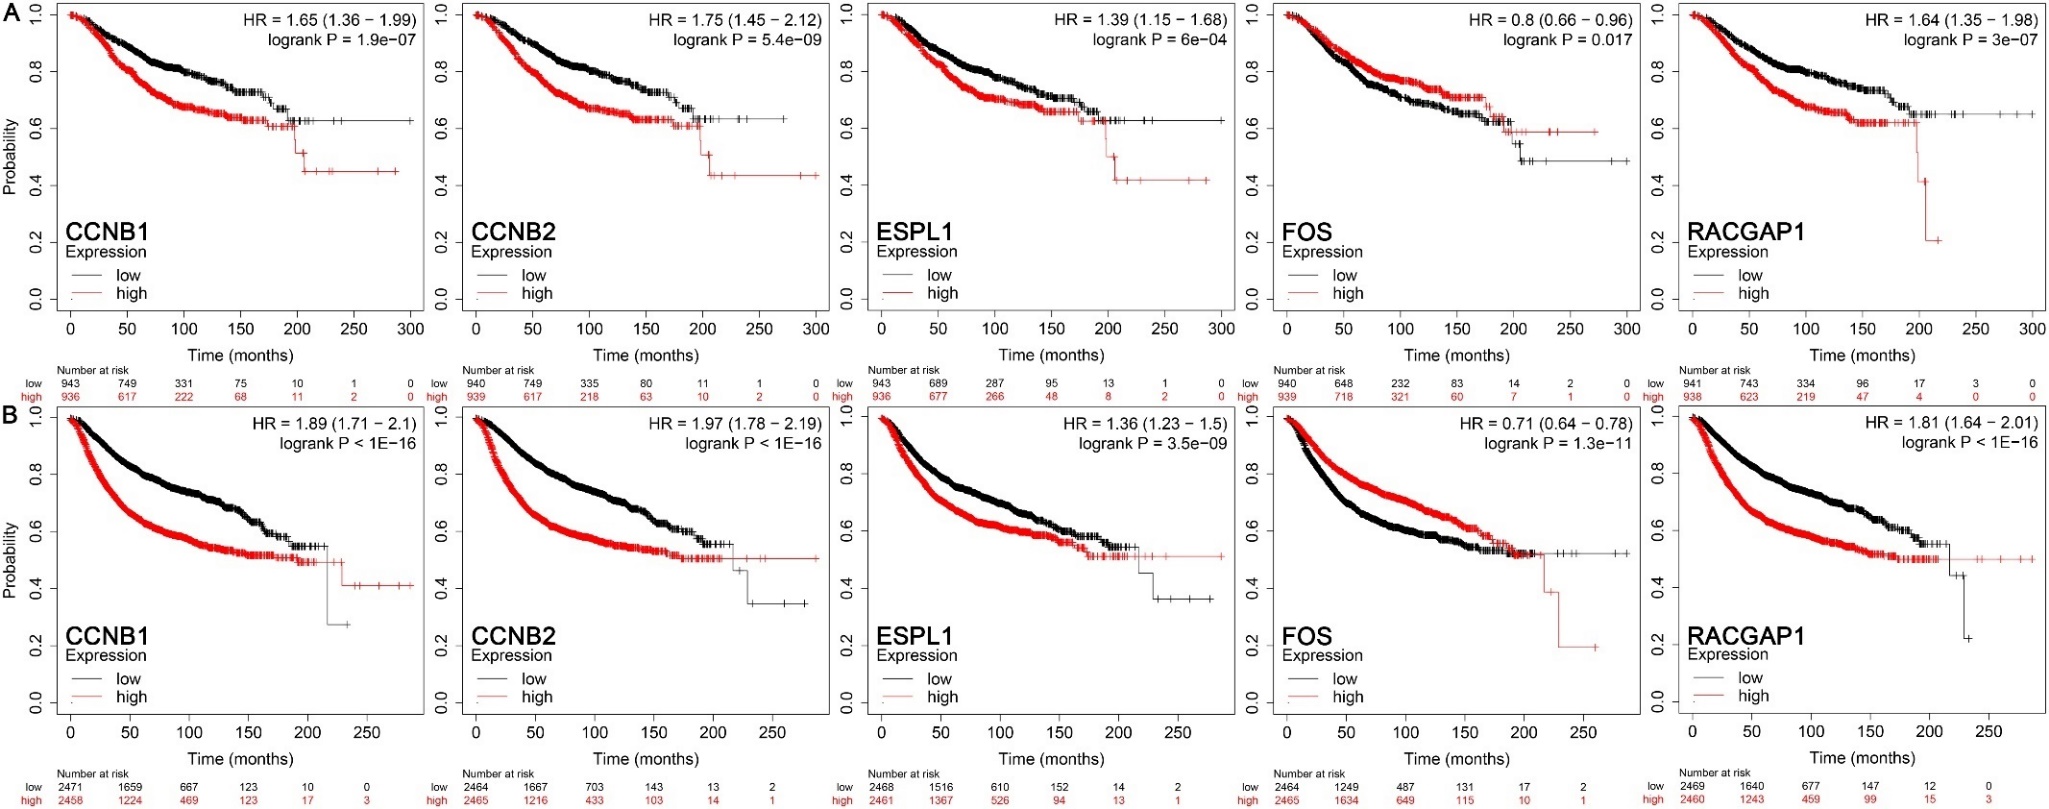
**
